# Supplementary material for: The use of sample positioning to control defect creation by oxygen plasma in isotopically labelled bilayer graphene membranes
Source: Royal Society of Chemistry journal article supplement (doi:10.1039/d1ra01249e), 2021-01-01
Supplement: d1ra01249e1.pdf [file d1ra01249e1.pdf]

## Supporting Information

# The use of sample positioning to control defect creation by oxygen plasma in isotopically labelled bilayer graphene membranes

Valentino L. P. Guerra,<sup>a</sup> Václav Valeš,<sup>a</sup> Jiří Mikšátko,<sup>a</sup> Jan Plšek,<sup>a</sup> Karolina Anna Drogowska-Horná,<sup>a</sup> Oleksandr Volochanskyi<sup>a</sup> and Martin Kalbáč<sup>\*a</sup>

<sup>a</sup> Department of Low-dimensional Systems, J. Heyrovský Institute of Physical Chemistry, Academy of Sciences of the Czech Republic, v.v.i., Dolejškova 3, 18223 Prague 8 Czech Republic

\* E-mail: martin.kalbac@jh-inst.cas.cz.

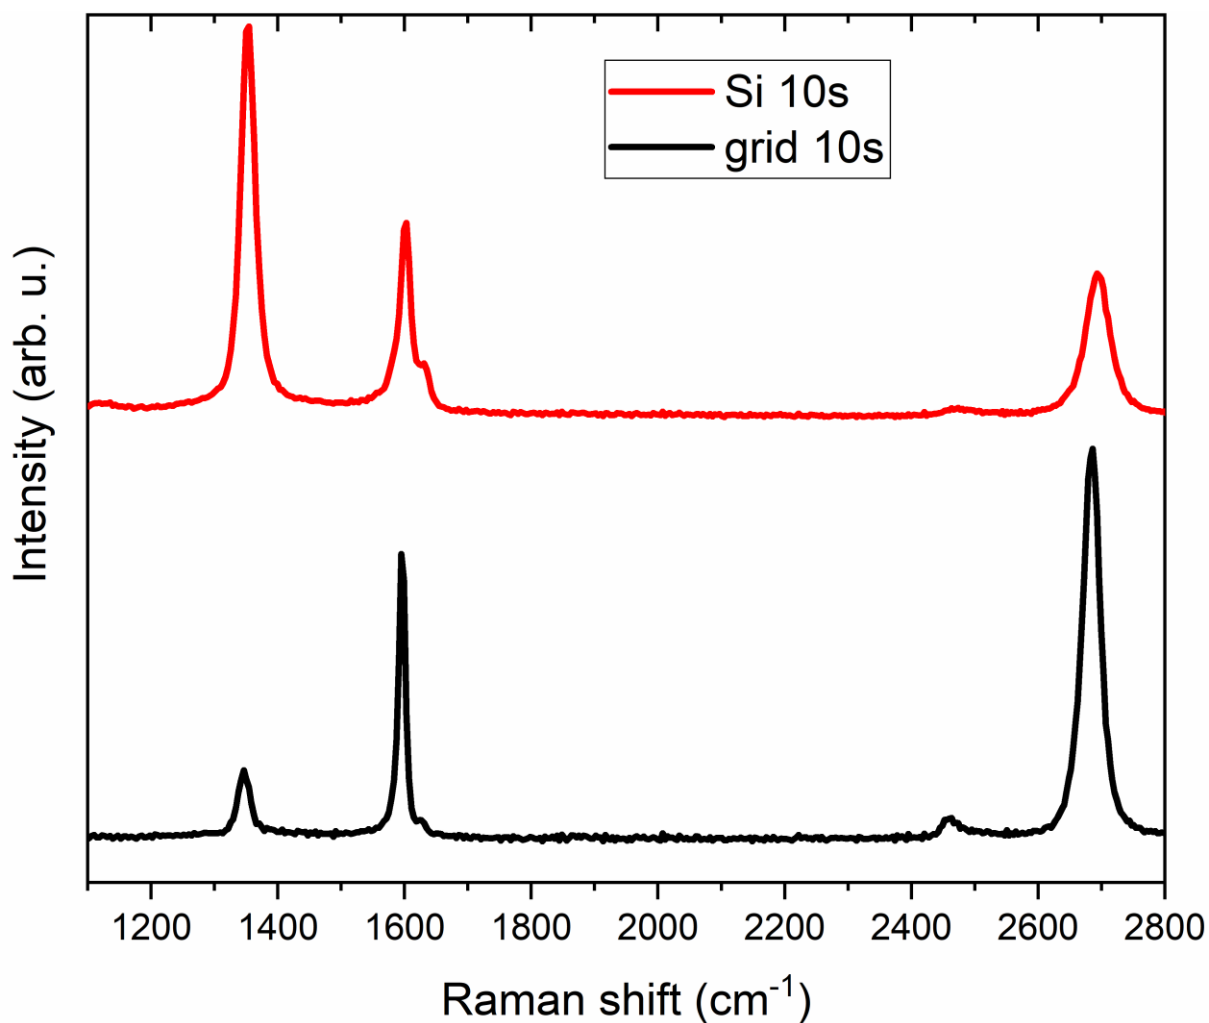

**Figure S 1.** Raman spectra of plasma-treated graphene (from <sup>12</sup>C) suspended on a TEM grid (black line) and Si/SiO<sub>2</sub> substrate (red line). The samples were transferred on a gold TEM grid or Si/SiO<sub>2</sub> respectively and then treated for 10 seconds in the plasma chamber at 0.77 mbar and 35% power (350W). It is possible to see the typical G and 2D bands, at around 1595 cm<sup>-1</sup> and 2670 cm<sup>-1</sup>, the D band located around 1350 cm<sup>-1</sup> and the D' around 1625 cm<sup>-1</sup>.

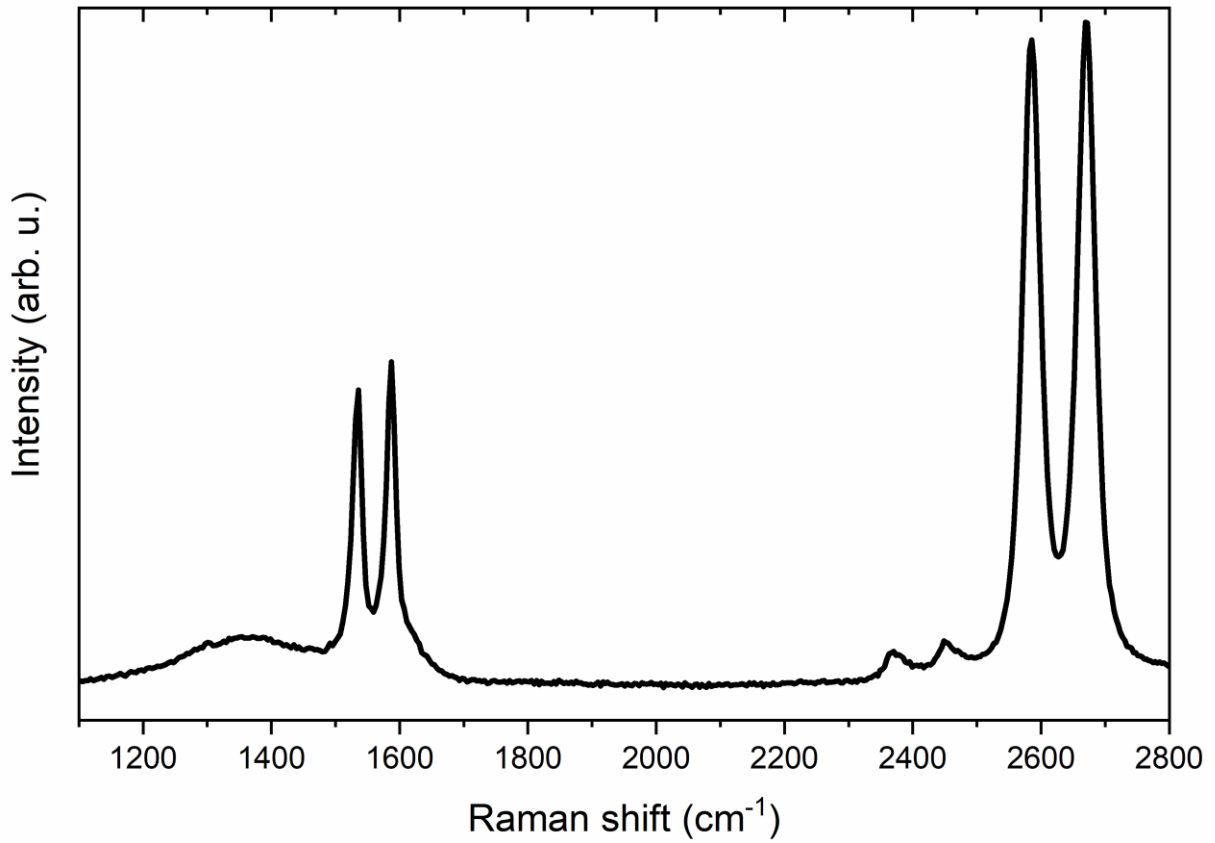

**Figure S 2.** Typical Raman spectrum of the bilayer graphene (<sup>12</sup>C+<sup>13</sup>C) deposited on the TEM grid before the plasma treatment. It is possible to see the typical G and 2D bands, at around 1595 cm<sup>-1</sup> and 2670 cm<sup>-1</sup> for <sup>12</sup>C and around 1535 cm<sup>-1</sup>, 2590 cm<sup>-1</sup> for <sup>13</sup>C without the presence of the D band for both layers.

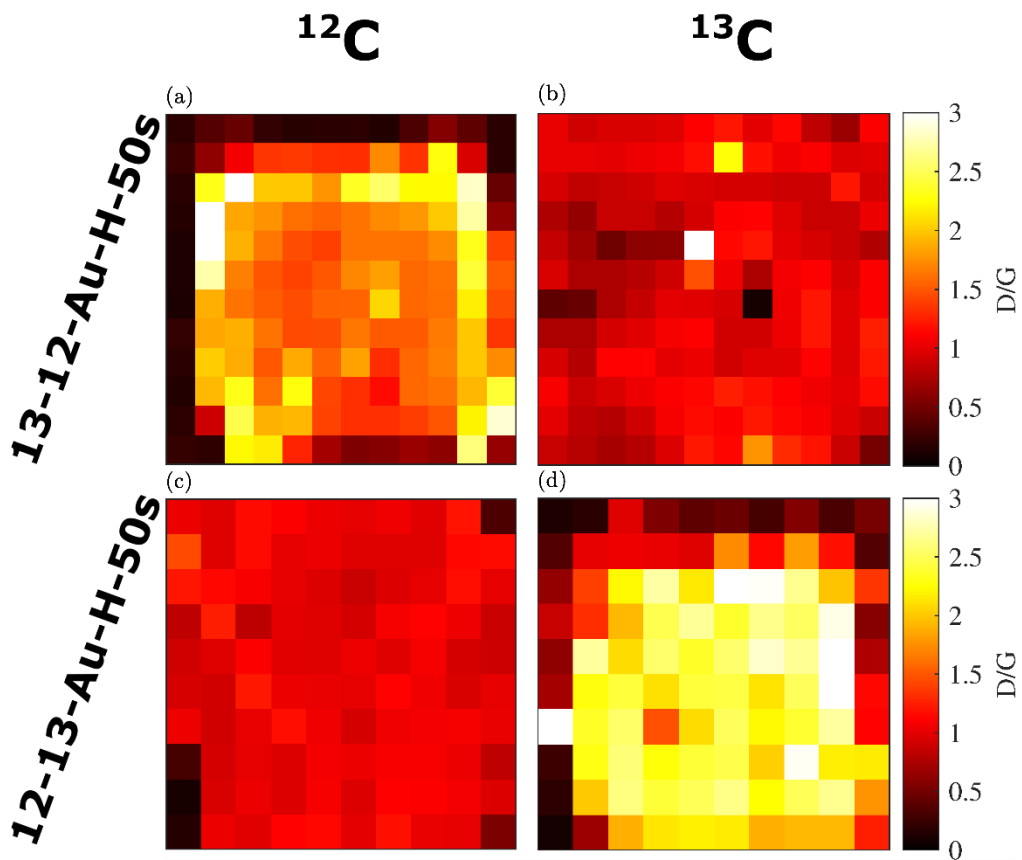

**Figure S 3.** Raman maps showing the uniformity of distribution of the D/G ratio. (a) and (b) refer to sample  $^{13}\text{-}^{12}\text{-Au-H-50s}$ , (c) and (d) refer to sample  $^{12}\text{-}^{13}\text{-Au-H-50s}$ . (a) and (c) show the data corresponding to the  $^{12}\text{C}$  bands, (b) and (d) show the data corresponding to  $^{13}\text{C}$  bands.

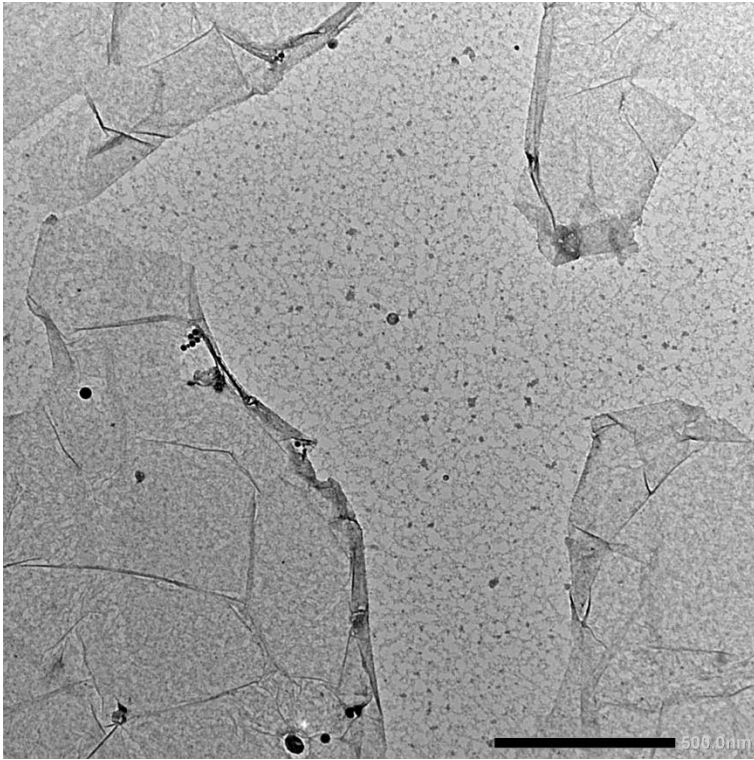

**Figure S 4.** HRTEM image of as-transferred bilayer graphene pointing out the difference in contrast between individual graphene layers (scale bar 500 nm).

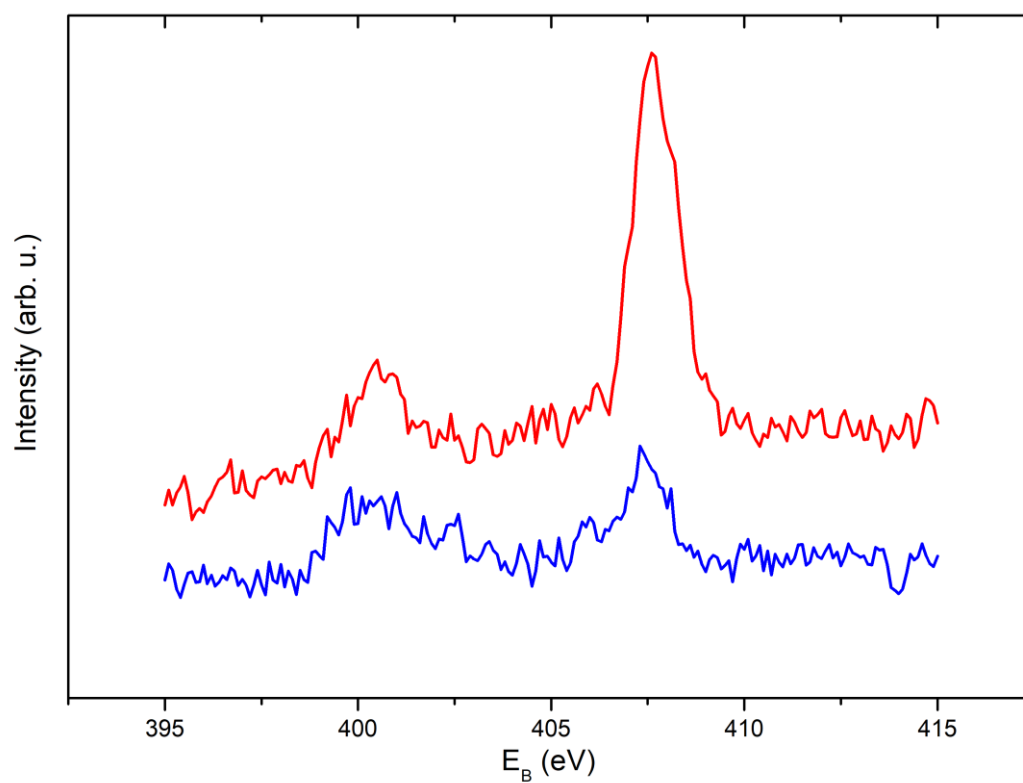

**Figure S 5.** Spectra of N 1s photoelectrons obtained for the sample **13-12-Au-H** before (red line) and after plasma treatment (blue line).
